# Supplementary material
Source: PubMed Central journal article supplement (PMC3513991)
Supplement: supp_140.1.31_DEV081851.pdf [file supp_140.1.31_DEV081851.pdf]

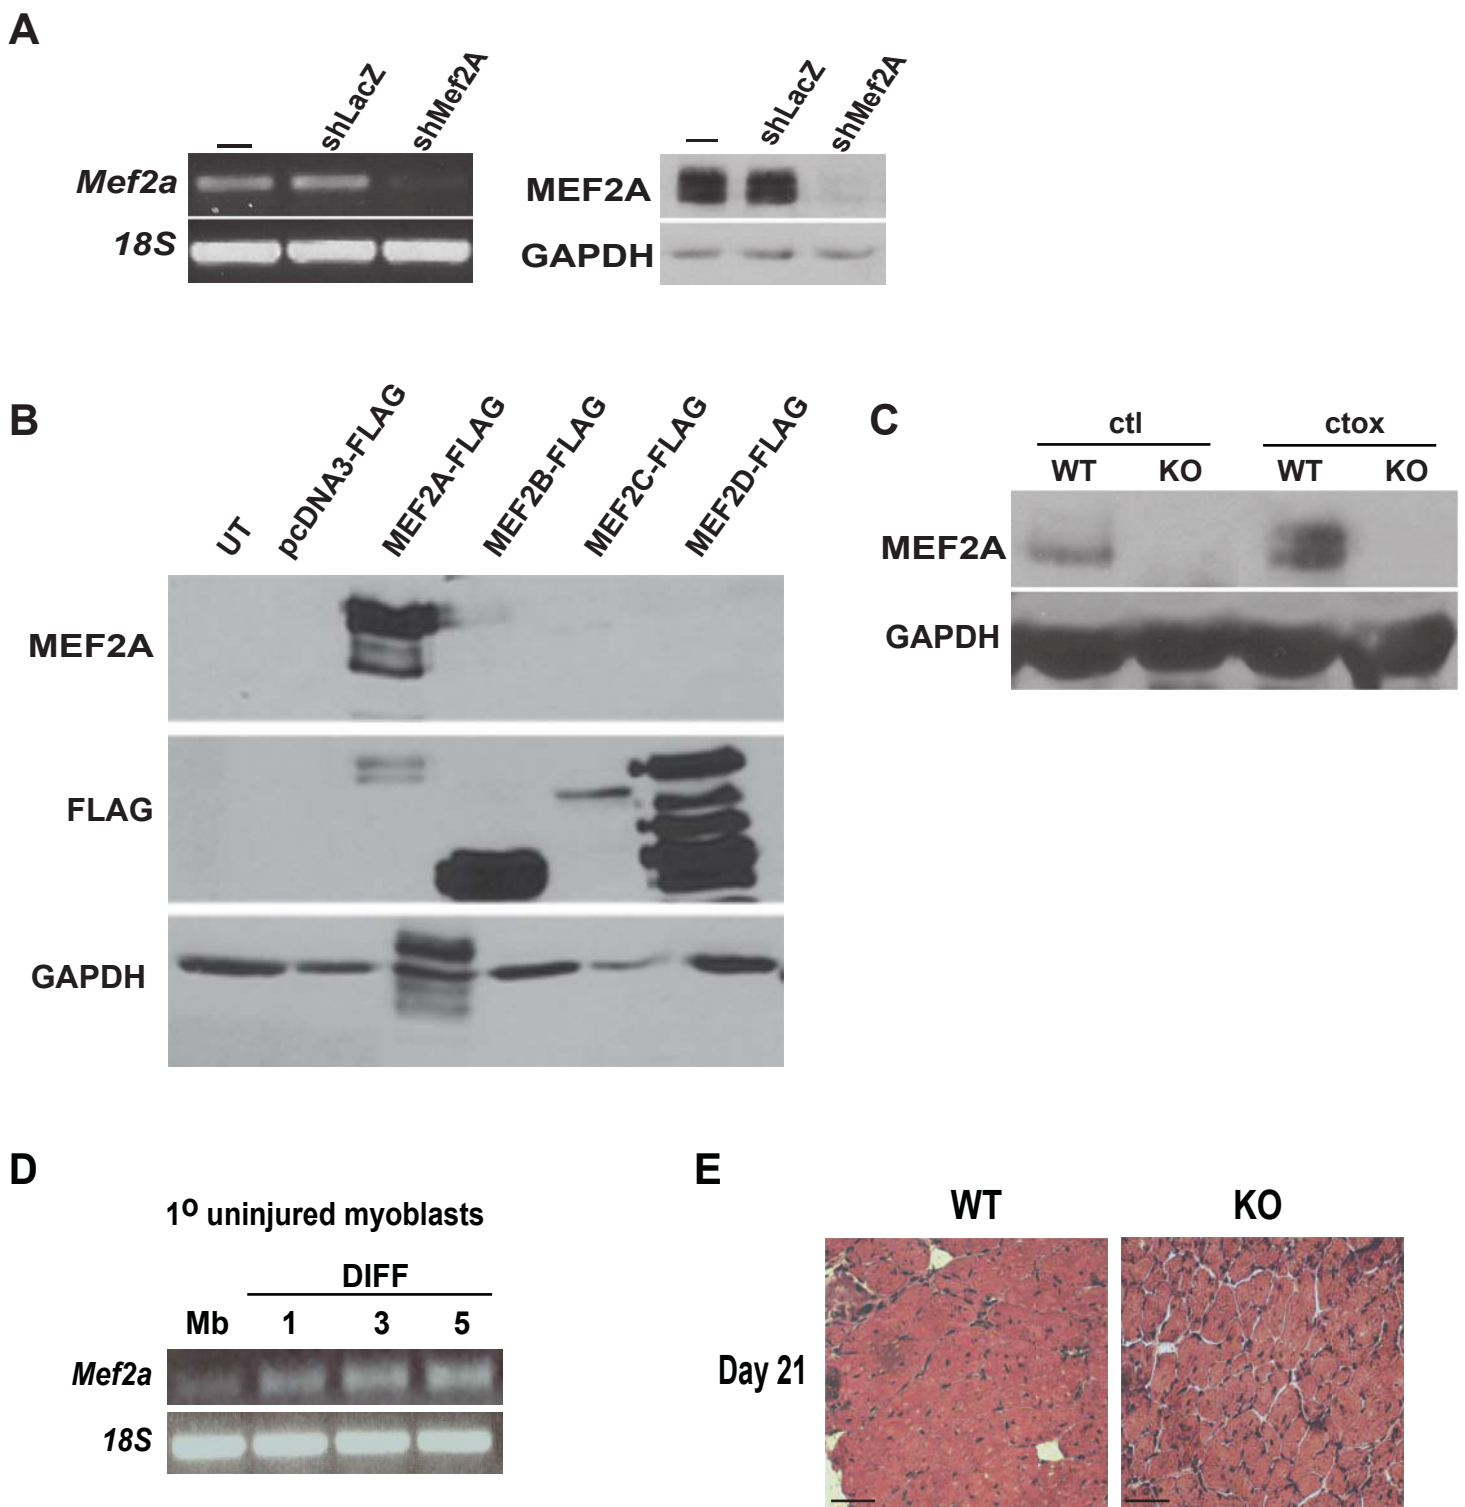

**Fig. S1. Antibody and shRNA specificity for MEF2A and MEF2A expression in regeneration.** (A) RT-PCR (left) and western blot (right) analysis of C2C12 DIFF3, post-transduction with *shlacZ* or *shMef2a*. 18S rRNA and GAPDH are loading controls. (B) Immunoblot of MEF2-FLAG expression in COS cells with the MEF2A antibody (C-21, Santa Cruz). GAPDH is the loading control. (C) Immunoblot of MEF2A expression in uninjured (ctl) and injured (ctox, day 7) skeletal muscle from WT and *Mef2a* KO mice. (D) RT-PCR analysis of *Mef2a* expression in differentiation using uninjured primary myoblasts. (E) Hematoxylin and Eosin staining of transverse TA muscle sections at day 21 post-injury. Data reveals substantially improved myofiber formation in regenerating *Mef2a* KO.

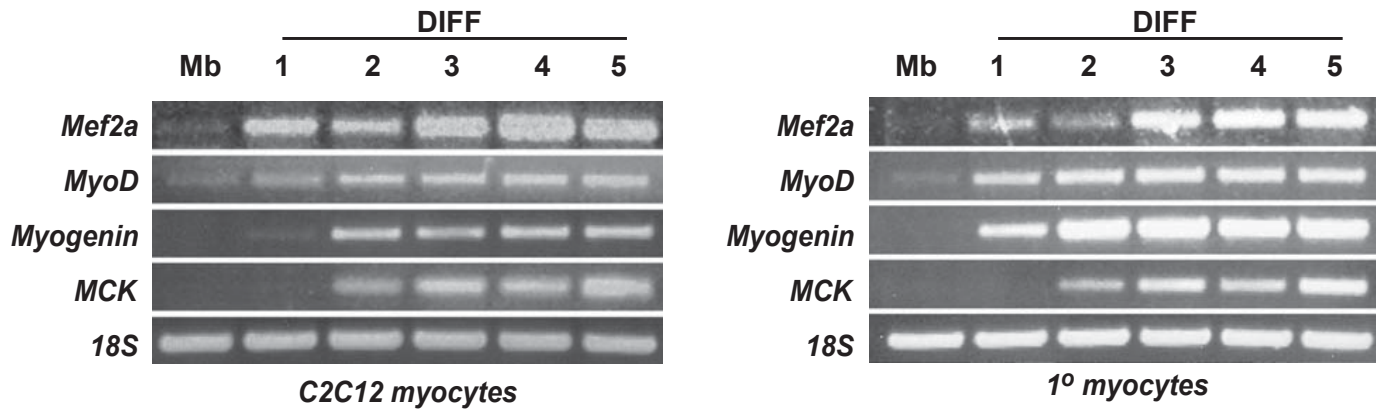

**Fig. S2. C2C12 differentiation mimics regenerating primary myocytes.** RT-PCR time course of myogenic marker expression during differentiation, myoblasts (Mb) through DIFF 5, in C2C12 cells and primary WT myocytes.

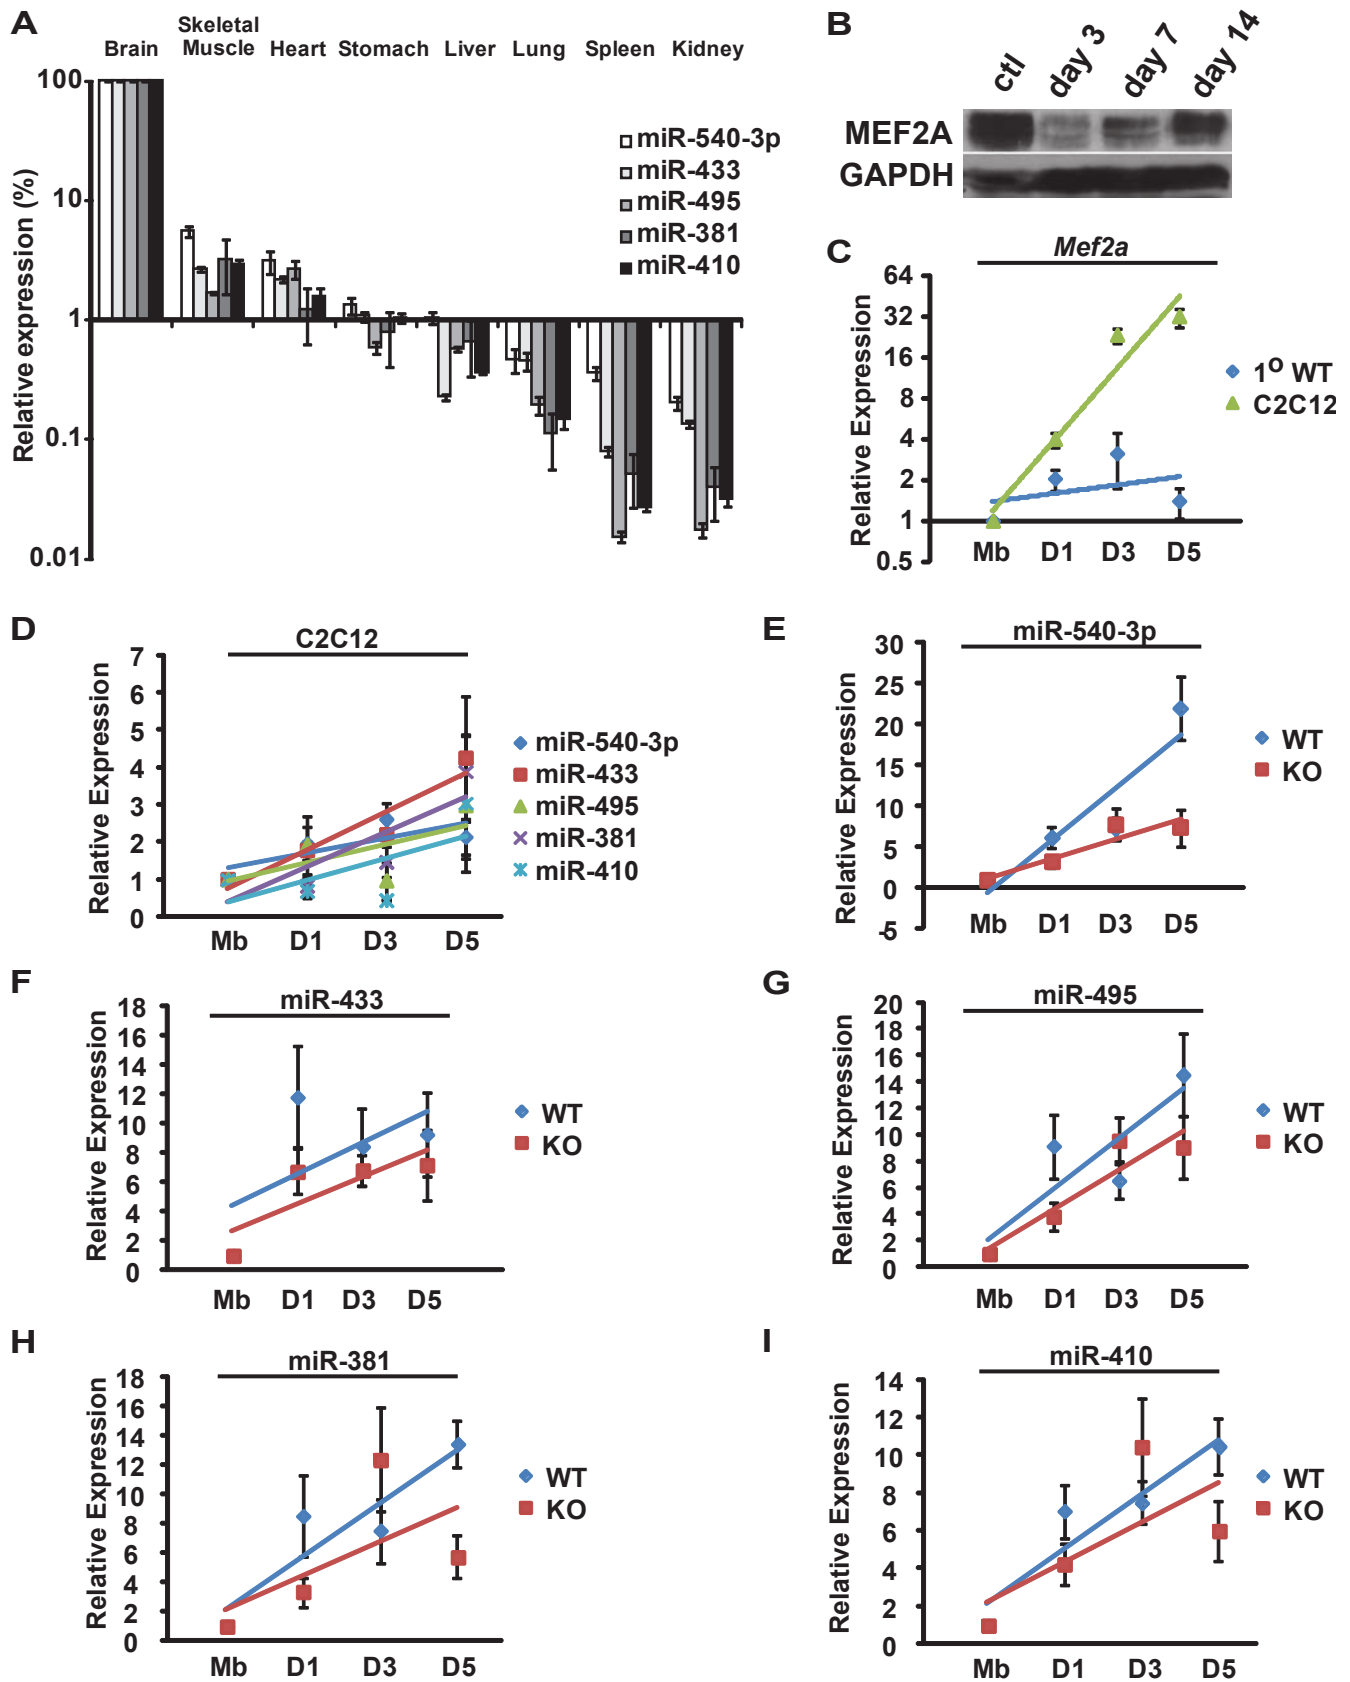

**Fig. S3. miR expression patterns mimic MEF2A.** (A) Expression of selected miRNAs in various tissues are displayed relative to the brain (normalized to 100%) ( $n=3$ ). (B) Immunoblot of MEF2A expression in control (ctl) and regenerating muscle (days 3-14). (C) *Mef2a* expression in primary WT myocytes and C2C12 cells during differentiation. (D) miR expression in C2C12 cells during differentiation. (E-I) Expression of individual miRNAs in WT and *Mef2a* KO primary myocytes during differentiation. Myoblast (Mb) and DIFF 1-5 (D1-D5) time points are indicated. Changes in expression are displayed as linear trendlines. Error bars represent s.e.m.

### RT-PCR

| Oligo    | Direction | Sequence 5' to 3'            |
|----------|-----------|------------------------------|
| 18SrRNA  | Forward   | CATTCGAACGTCTGCCCTAT         |
|          | Reverse   | CCTCCAATGGATCCTCGTTA         |
| Mef2a    | Forward   | ACACGCATAATGGATGAGAGGAACCGAC |
|          | Reverse   | CAACGATATCCGAGTTCGTCCTGCTTTC |
| Mef2b    | Forward   | GAAAGAAAGCCGCTCTGCACAG       |
|          | Reverse   | ACCTCTGGCCCCCTCTCCATA        |
| Mef2c    | Forward   | CAGGGACGAGAGAGAGAAGAAAC      |
|          | Reverse   | CAATCTTTGCCTGCTGATCATTAG     |
| Mef2d    | Forward   | CTTTCCTCTCTGGCACTAAGGAC      |
|          | Reverse   | CCAGTCTATAACTCTGCATCATC      |
| MyoD     | Forward   | TCAAGGTCTGCAGGCTCTGC         |
|          | Reverse   | TGCAGTCGATCTCTCAAAGCACC      |
| Myogenin | Forward   | TGGAGCTGTATGAGACATCCC        |
|          | Reverse   | GAGTTGCATTCACTGGGCAC         |
| MCK      | Forward   | CTGACCCCTGACCTCTACAAT        |
|          | Reverse   | CATGGCGGTCTGGATGAT           |

### qRT-PCR

| Oligo                | Direction | Sequence 5' to 3'                                   |
|----------------------|-----------|-----------------------------------------------------|
| GAPDH                | Forward   | TGGCAAAGTGGAGATTGTTGCC                              |
|                      | Reverse   | AAGATGGTGATGGGCTTCCCG                               |
| Dlk1                 | Forward   | AGTGCGAAACCTGGGTGTC                                 |
|                      | Reverse   | GCCTCCTTGTGAAAGTGGTCA                               |
| Gtl2                 | Forward   | TGGAATAGGCCAACATCGTCA                               |
|                      | Reverse   | AGGCTCTGTGTCCATGTGTCC                               |
| pre-miR-127          | Forward   | TTTGATCACTGTCTCCAGCCTGCTG                           |
|                      | Reverse   | GATGATGAGACTTCCGACCAGCCA                            |
| sFRP1                | Forward   | CAACGTGGGCTACAAGAAGAT                               |
|                      | Reverse   | GGCCAGTAGAAGCCGAAGAAC                               |
| sFRP2                | Forward   | CCCCTGTCTGTCTCGACGA                                 |
|                      | Reverse   | CTTCACACACCTTGGGAGCTT                               |
| sFRP4                | Forward   | AGAAGGTCCATACAGTGGGAAG                              |
|                      | Reverse   | GTTACTGCGACTGGTGCGA                                 |
| Axin2                | Forward   | TGACTCTCCTTCCAGATCCCA                               |
|                      | Reverse   | TGCCACACTAGGCTGACA                                  |
| 5S rRNA stem loop    | Forward   | GTTGGCTCTGGTGCAGGGTCCGAGGTATTCGCACCAAGGCCAACAAAGCC  |
| miR 540-3p stem loop | Forward   | GTTGGCTCTGGTGCAGGGTCCGAGGTATTCGCACCAAGGCCAACACAGAG  |
| miR 433 stem loop    | Forward   | GTTGGCTCTGGTGCAGGGTCCGAGGTATTCGCACCAAGGCCAACACACCCG |
| miR 495 stem loop    | Forward   | GTTGGCTCTGGTGCAGGGTCCGAGGTATTCGCACCAAGGCCAACAAAGAG  |
| miR 381 stem loop    | Forward   | GTTGGCTCTGGTGCAGGGTCCGAGGTATTCGCACCAAGGCCAACACAGAG  |
| miR 410 stem loop    | Forward   | GTTGGCTCTGGTGCAGGGTCCGAGGTATTCGCACCAAGGCCAACACAGGC  |
| 5SrRNA               | Forward   | GAATACCGGGTCTGTAGGC                                 |
| miR 540-3p           | Forward   | CAAGGGTCACCCTCTGACTCT                               |
| miR 433              | Forward   | ATCATGATGGGCTCCTCGGT                                |
| miR 495              | Forward   | GCCAAACAACATGGTGCCTT                                |
| miR 381              | Forward   | GCCTATACAAGGGCAAGCTCTC                              |
| miR 410              | Forward   | CCGCCAATATAACACAGATGGCC                             |
| ChIP -39 MEF2        | Forward   | TCTGGGGGGCTCATTTTTCCG                               |
|                      | Reverse   | GAGCCGAGGCGAGCTCTATTC                               |

### EMSA

| Oligo    | Direction | Sequence 5' to 3'                   |
|----------|-----------|-------------------------------------|
| -39 MEF2 | Sense     | AAGGCTGCGC <u>TTTATATAAA</u> CCCCA  |
|          | Antisense | AAGGTGGGG <u>TTTATATAAA</u> GCGCAG  |
| -39 MUT  | Sense     | AAGGCTGCGC <u>GGTATATAAA</u> CCCCA  |
|          | Antisense | AAGGTGGGG <u>TTTATATA</u> CCCGCGCAG |

**Table S1. Oligonucleotide sequences.** Oligonucleotides used for RT-PCR/qRT PCR and EMSA analyses. DNA binding sites in EMSA oligonucleotides are underlined.

| Gene Symbol   | Fold Change |
|---------------|-------------|
| miR-337       | -1.7        |
| miR-540       | -1.6        |
| miR-665       | -1.3        |
| miR-431       | -1.2        |
| miR-341       | -1.4        |
| miR 370       | -1.3        |
| Rian/MBII-343 | -2.1        |
| miR-379       | -1.7        |
| miR-411       | -1.4        |
| miR-299       | -1.6        |
| miR-380       | -1.4        |
| miR-329       | -1.6        |
| miR-494       | -1.3        |
| miR-679       | -1.6        |
| miR-666       | -1.4        |
| miR-543       | -1.7        |
| miR-667       | -1.4        |
| miR-376c      | -1.2        |
| miR-376b      | -1.2        |
| miR-376a      | -1.1        |
| miR-300       | -1.4        |
| miR-381       | -1.5        |
| miR-382       | -1.4        |
| miR-134       | -1.8        |
| miR-668       | -1.3        |
| miR-154       | -1.6        |
| miR-496       | -1.4        |
| miR-377       | -1.5        |
| miR-541       | 1.0         |
| miR-412       | -1.7        |
| miR-369       | -1.5        |

**Table S2. MicroRNA expression in injured *Mef2a* KO muscle.** Fold changes in gene expression are presented for additional non-coding RNA transcripts in the *Gtl2-Dio3* locus detected by microarray. Expression values represent fold changes in gene expression between adult *Mef2a* KO cardiotoxin-injured (ctox) and WT ctox muscle tissue samples at regeneration day 7. Non-coding transcripts include microRNAs and the Rian/MBII-343 C/D box sno RNAs and are listed from top to bottom according to their 5' to 3' order within the *Gtl2-Dio3* locus.
